# Supplementary figures and images for: Differentiation of neuroepithelial stem cells into functional dopaminergic neurons in 3D microfluidic cell culture
Source: Royal Society of Chemistry journal article supplement (doi:10.1039/c5lc00180c), 2015-01-01

**a**

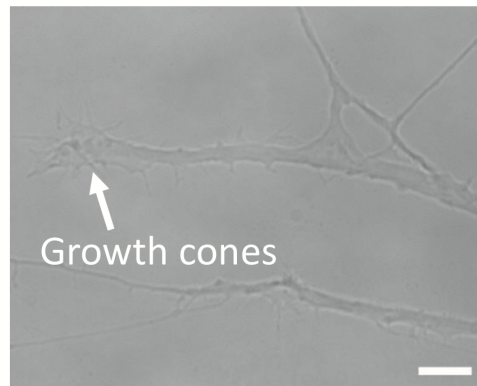

**b**

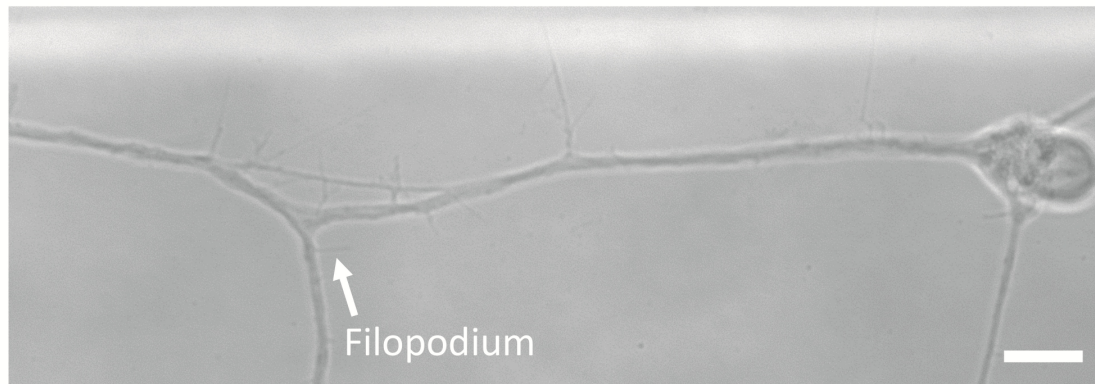

**c**

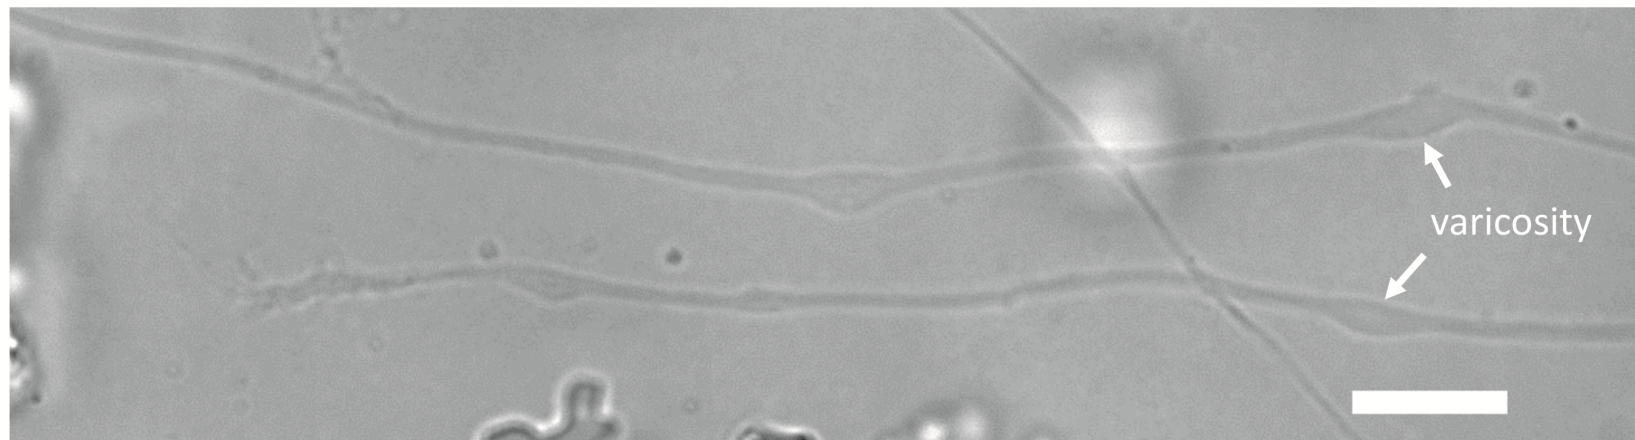

Supplement: c5lc00180c1.pdf [file c5lc00180c1.pdf]
